# Supplementary material
Source: PubMed Central journal article supplement (PMC7541419)
Supplement: NIHMS1587857-supplement-1.pdf [file NIHMS1587857-supplement-1.pdf]

# Supplementary Fig S1:

C4d deposition on days 2 to 28 in A/J kidneys transplanted to C57BL/6 mice

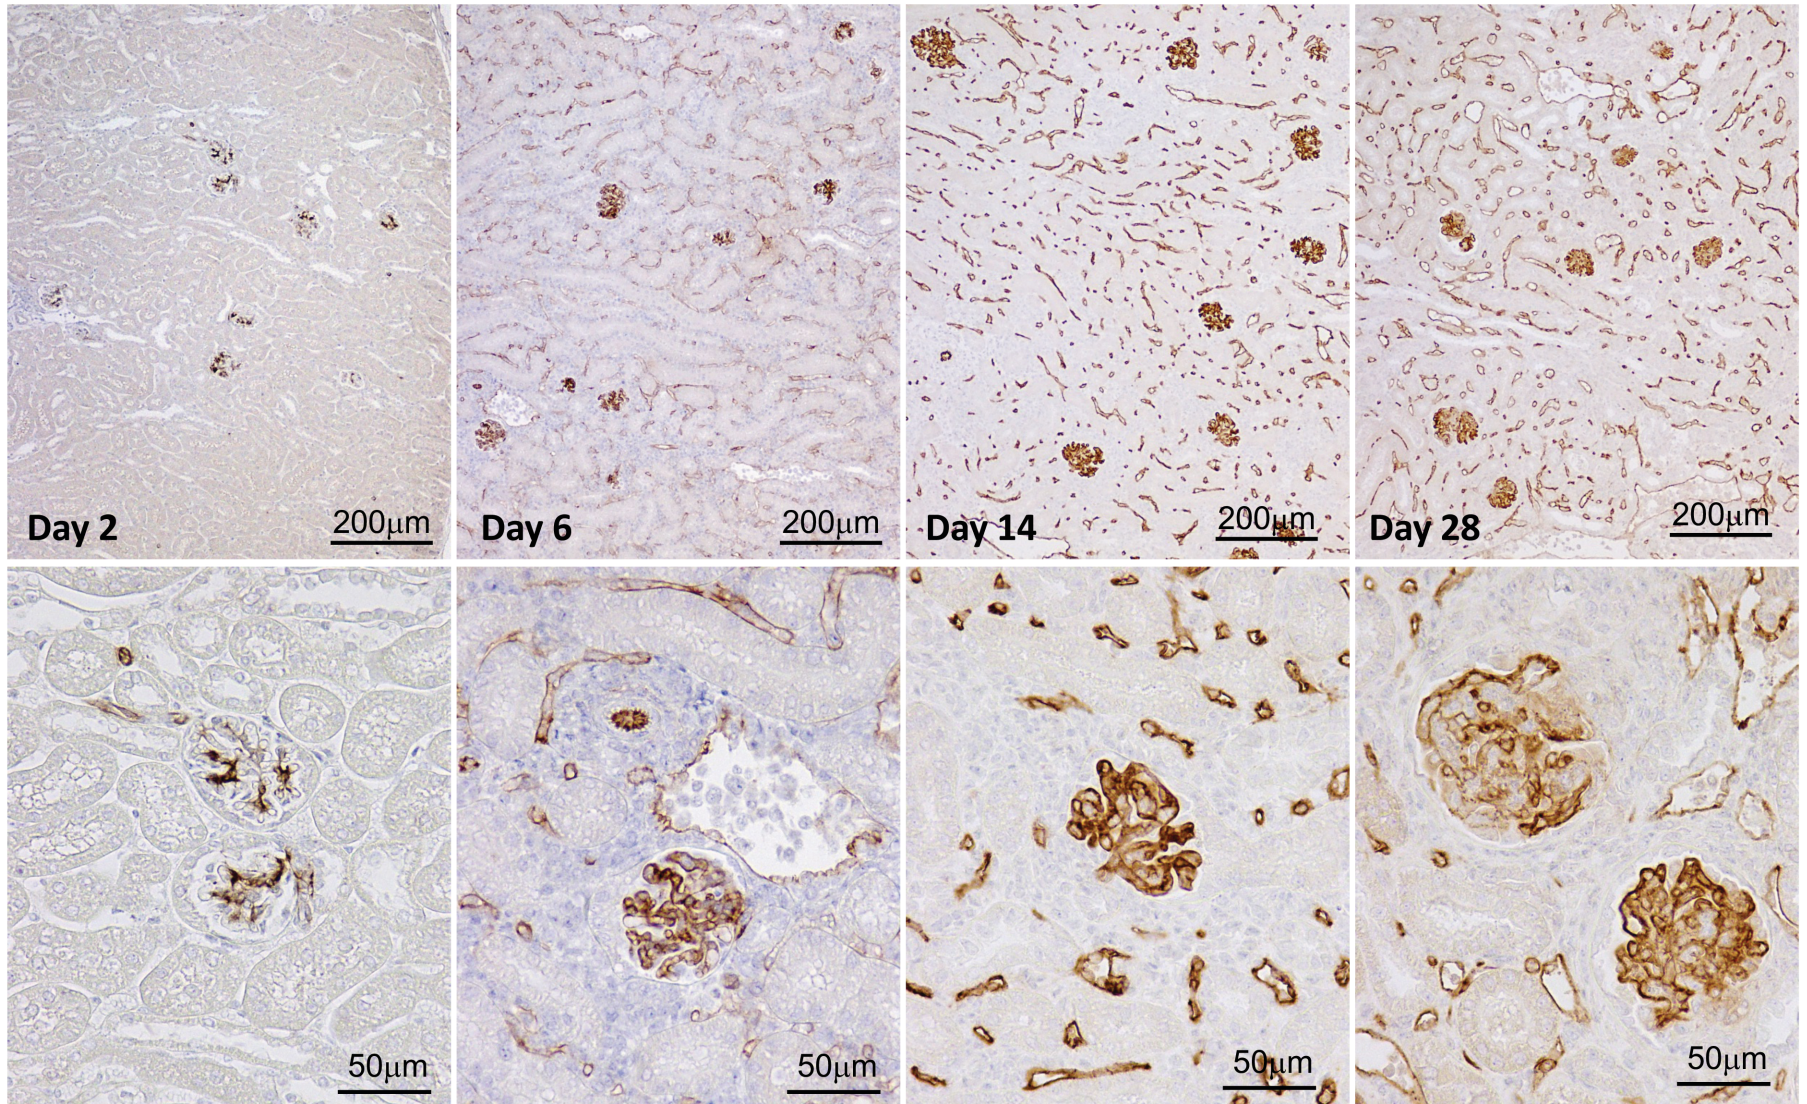

Supplementary Fig S2:

**Expression of PD-L1 in relation to PD-1 positive cells infiltrating the tubules in allografts to mice treated with blocking antibody to PD-L1.**

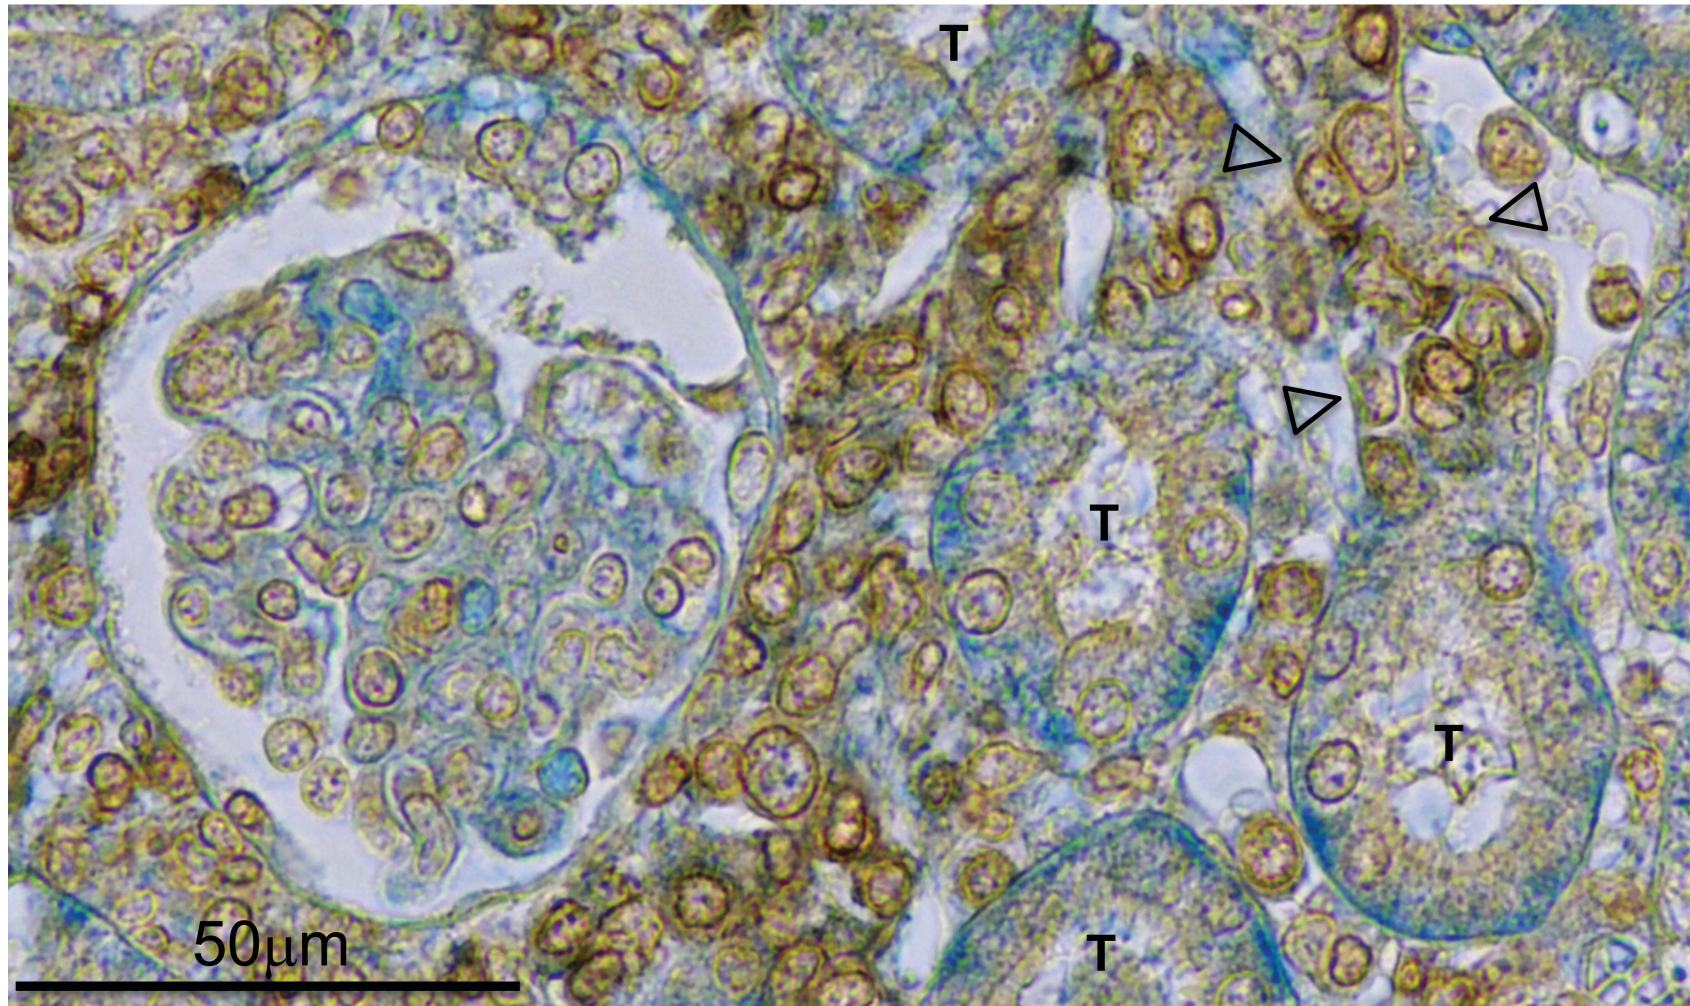

Supplementary Fig S3:

**PD-L1 blockade increases mitotically active CD4 T cells and tubular injury.**

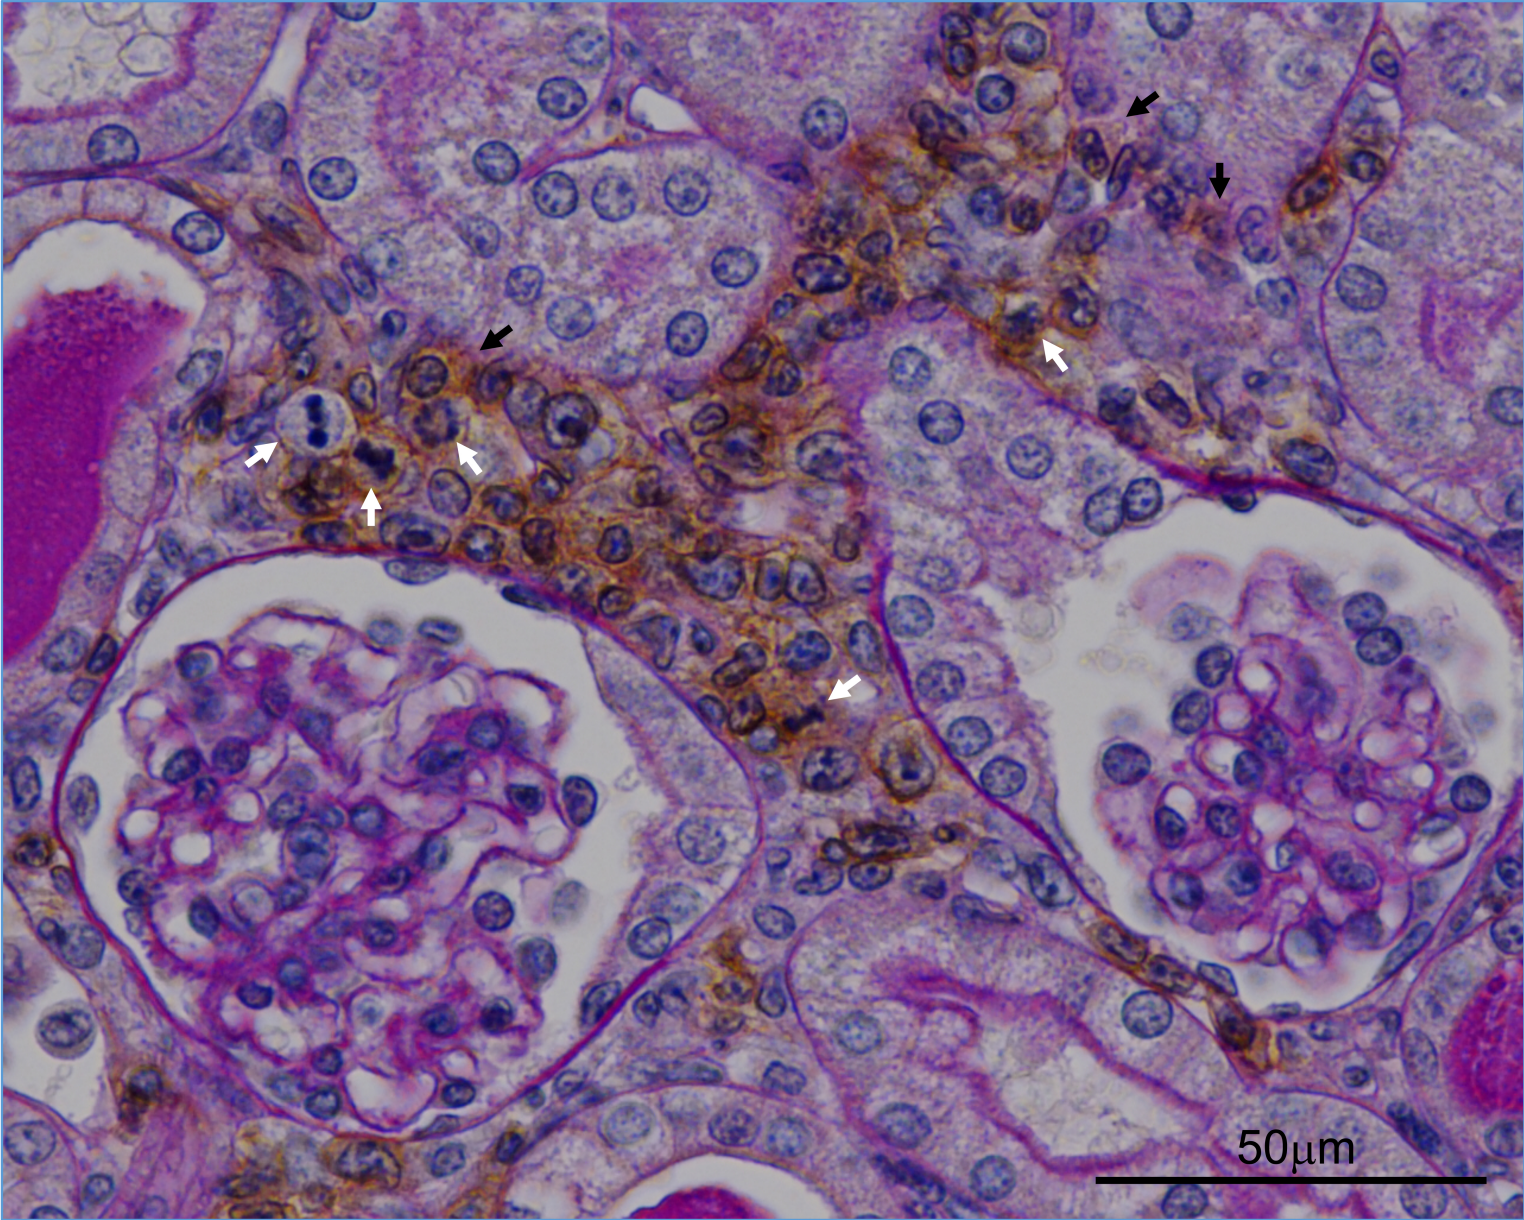

Supplementary Fig S4:

**C4d deposition 6 days after renal allografts to mice treated with blocking antibody to PD-L1 with or without depletion of T cells**

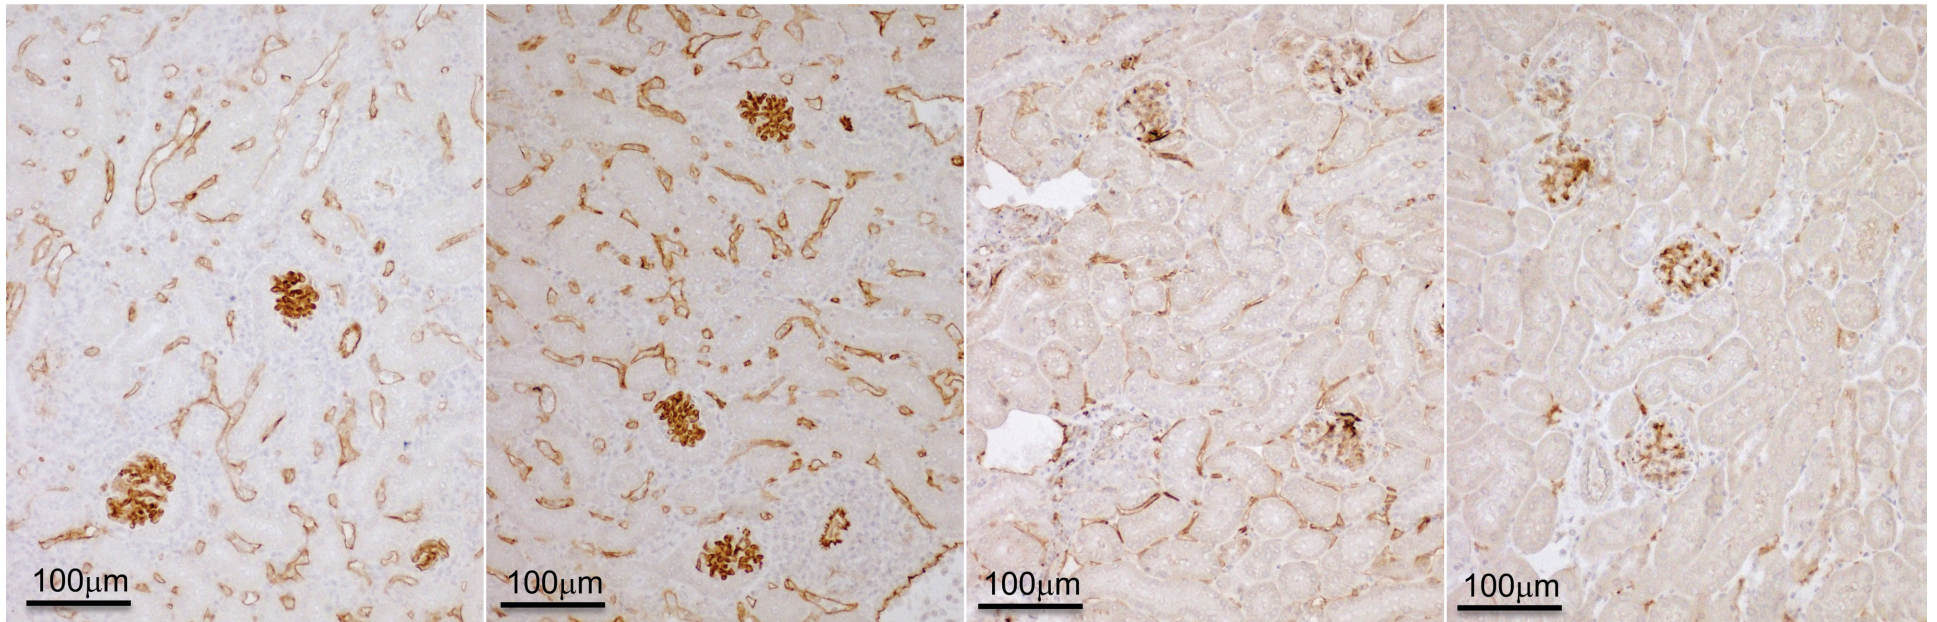

Anti-PDL1 alone

Anti-PDL1 +  
Anti-CD8

Anti-PDL1 +  
Anti-CD4

Anti-PDL1 +  
Anti-CD4 & CD8

## Supplementary Fig S5:

### PD-L1 blockade increases PD-1 expressing T cells and effector function

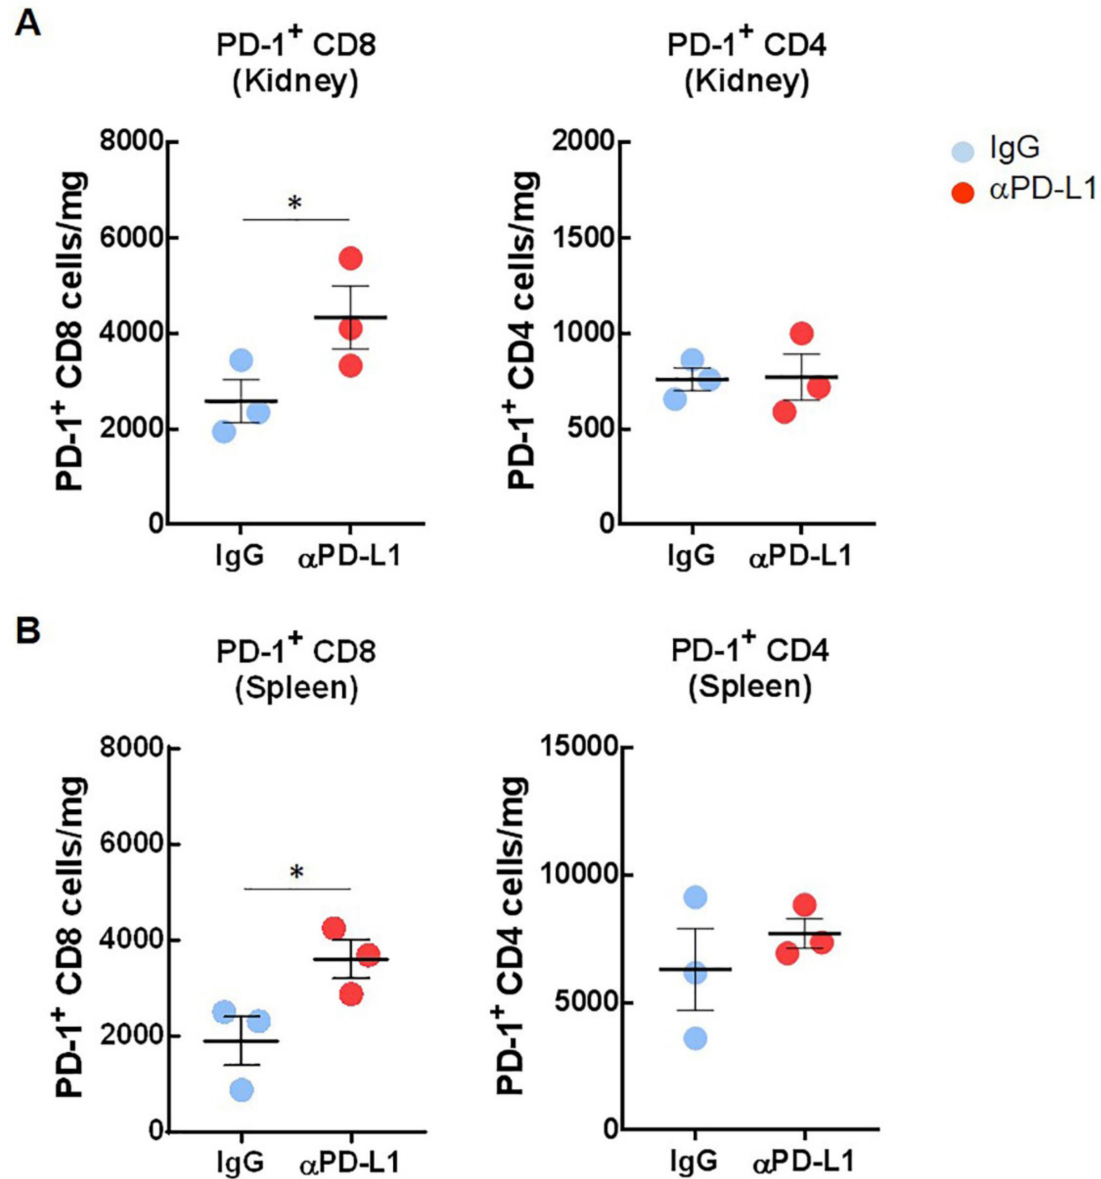

Supplementary Fig S6.

**Gating strategy for flow cytometry analysis.**

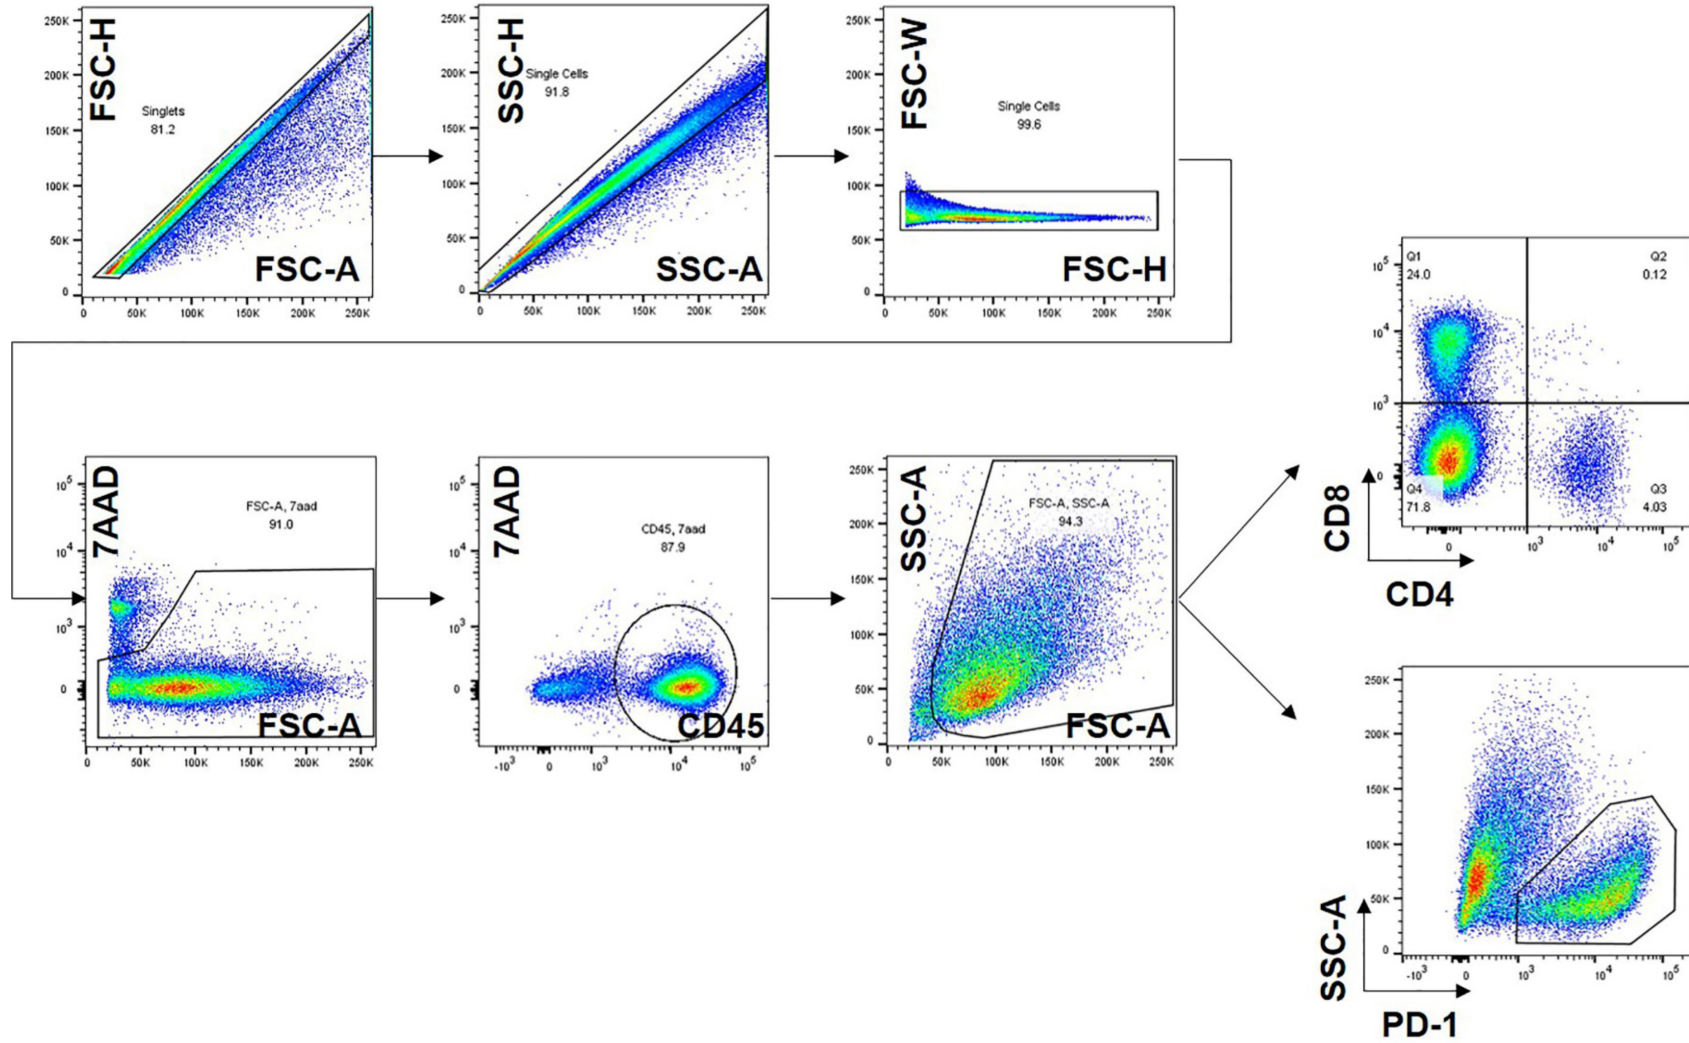

**Fig. 3A**

**Fig. 3D**

Supplementary Table S1:

Effects of treatment with antibodies to PD-L1, CD4 and CD8 on C4d deposition kidneys 6 days after transplantation.

| Treatment      |               | Peritubular Capillaries* |             |             |                                           |             | Glomerulus*               |
|----------------|---------------|--------------------------|-------------|-------------|-------------------------------------------|-------------|---------------------------|
| Anti-CD4/CD8** | Anti-PD-L1*** | n                        | Diffuseness | Intensity   | Dilatation/<br>loss vascular<br>integrity | Margination | Glomerular<br>capillaries |
| No             | Control Ig    | 5                        | 1.6 +/- 0.6 | 1.6 +/- 0.6 | 1.6 +/- 0.6                               | 1.8 +/- 0.5 | 1.7 +/- 0.7               |
| No             | Anti-PD-L1    | 5                        | 1.8 +/- 0.5 | 1.6 +/- 0.6 | 1.4 +/- 0.6                               | 1.8 +/- 0.5 | 1.6 +/- 0.6               |
| Control Ig     | Anti-PD-L1    | 8                        | 1.9 +/- 0.7 | 2.1 +/- 0.8 | 2.1 +/- 1.1                               | 1.9 +/- 0.8 | 2.3 +/- 0.7               |
| CD4            | Anti-PD-L1    | 3                        | 1.7 +/- 1.2 | 2.0 +/- 1.0 | 1.3 +/- 1.2                               | 1.3 +/- 1.2 | 1.7 +/- 1.2               |
| CD8            | Anti-PD-L1    | 3                        | 2.0 +/- 0.0 | 2.3 +/- 0.6 | 1.7 +/- 1.2                               | 2.0 +/- 1.0 | 2.7 +/- 0.6               |
| CD4+CD8        | Anti-PD-L1    | 3                        | 0.7 +/- 0.3 | 1.0 +/- 0.9 | 0                                         | 0           | 1.2 +/- 0.8               |

\* Average of 0 to 3 score +/- standard deviation

\*\* Monoclonal antibodies to CD4 (GK1.5, YTS91) and CD8 (53-6.7, YTS169.4) were administered on days 0 and 3 after transplantation to deplete T cells.

\*\*\* Monoclonal antibody to PD-L1 (10F.9G2) or isotype control IgG (LTF-2) was administered on days 3 and 5 after transplantation.
